# Supplementary material for: Interlaboratory reproducibility of ID-TIMS U–Pb geochronology evaluated with a pre-spiked natural zircon solution
Source: Copernicus journal article supplement (doi:10.5194/gchron-7-409-2025), 2025-09-04
Supplement: Supplementary file 1 [file gchron-7-409-2025-supplement.zip]

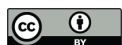

*Supplement of*

## **Interlaboratory reproducibility of ID-TIMS U–Pb geochronology evaluated with a pre-spiked natural zircon solution**

**Dawid Szymanowski et al.**

*Correspondence to:* Dawid Szymanowski ([dawid.szymanowski@eaps.ethz.ch](mailto:dawid.szymanowski@eaps.ethz.ch))

- [gchron-7-409-2025-supplement-title-page.pdf](#)
- [Figure\\_S1.pdf](#)
- [Table\\_S1.xlsx](#)

The copyright of individual parts of the supplement might differ from the article licence.
