# Supplementary figures and images for: Interlaboratory reproducibility of ID-TIMS U–Pb geochronology evaluated with a pre-spiked natural zircon solution
Source: Copernicus journal article supplement (doi:10.5194/gchron-7-409-2025), 2025-09-04

Figure S1. Concordia diagrams of PLES535 results by laboratory.

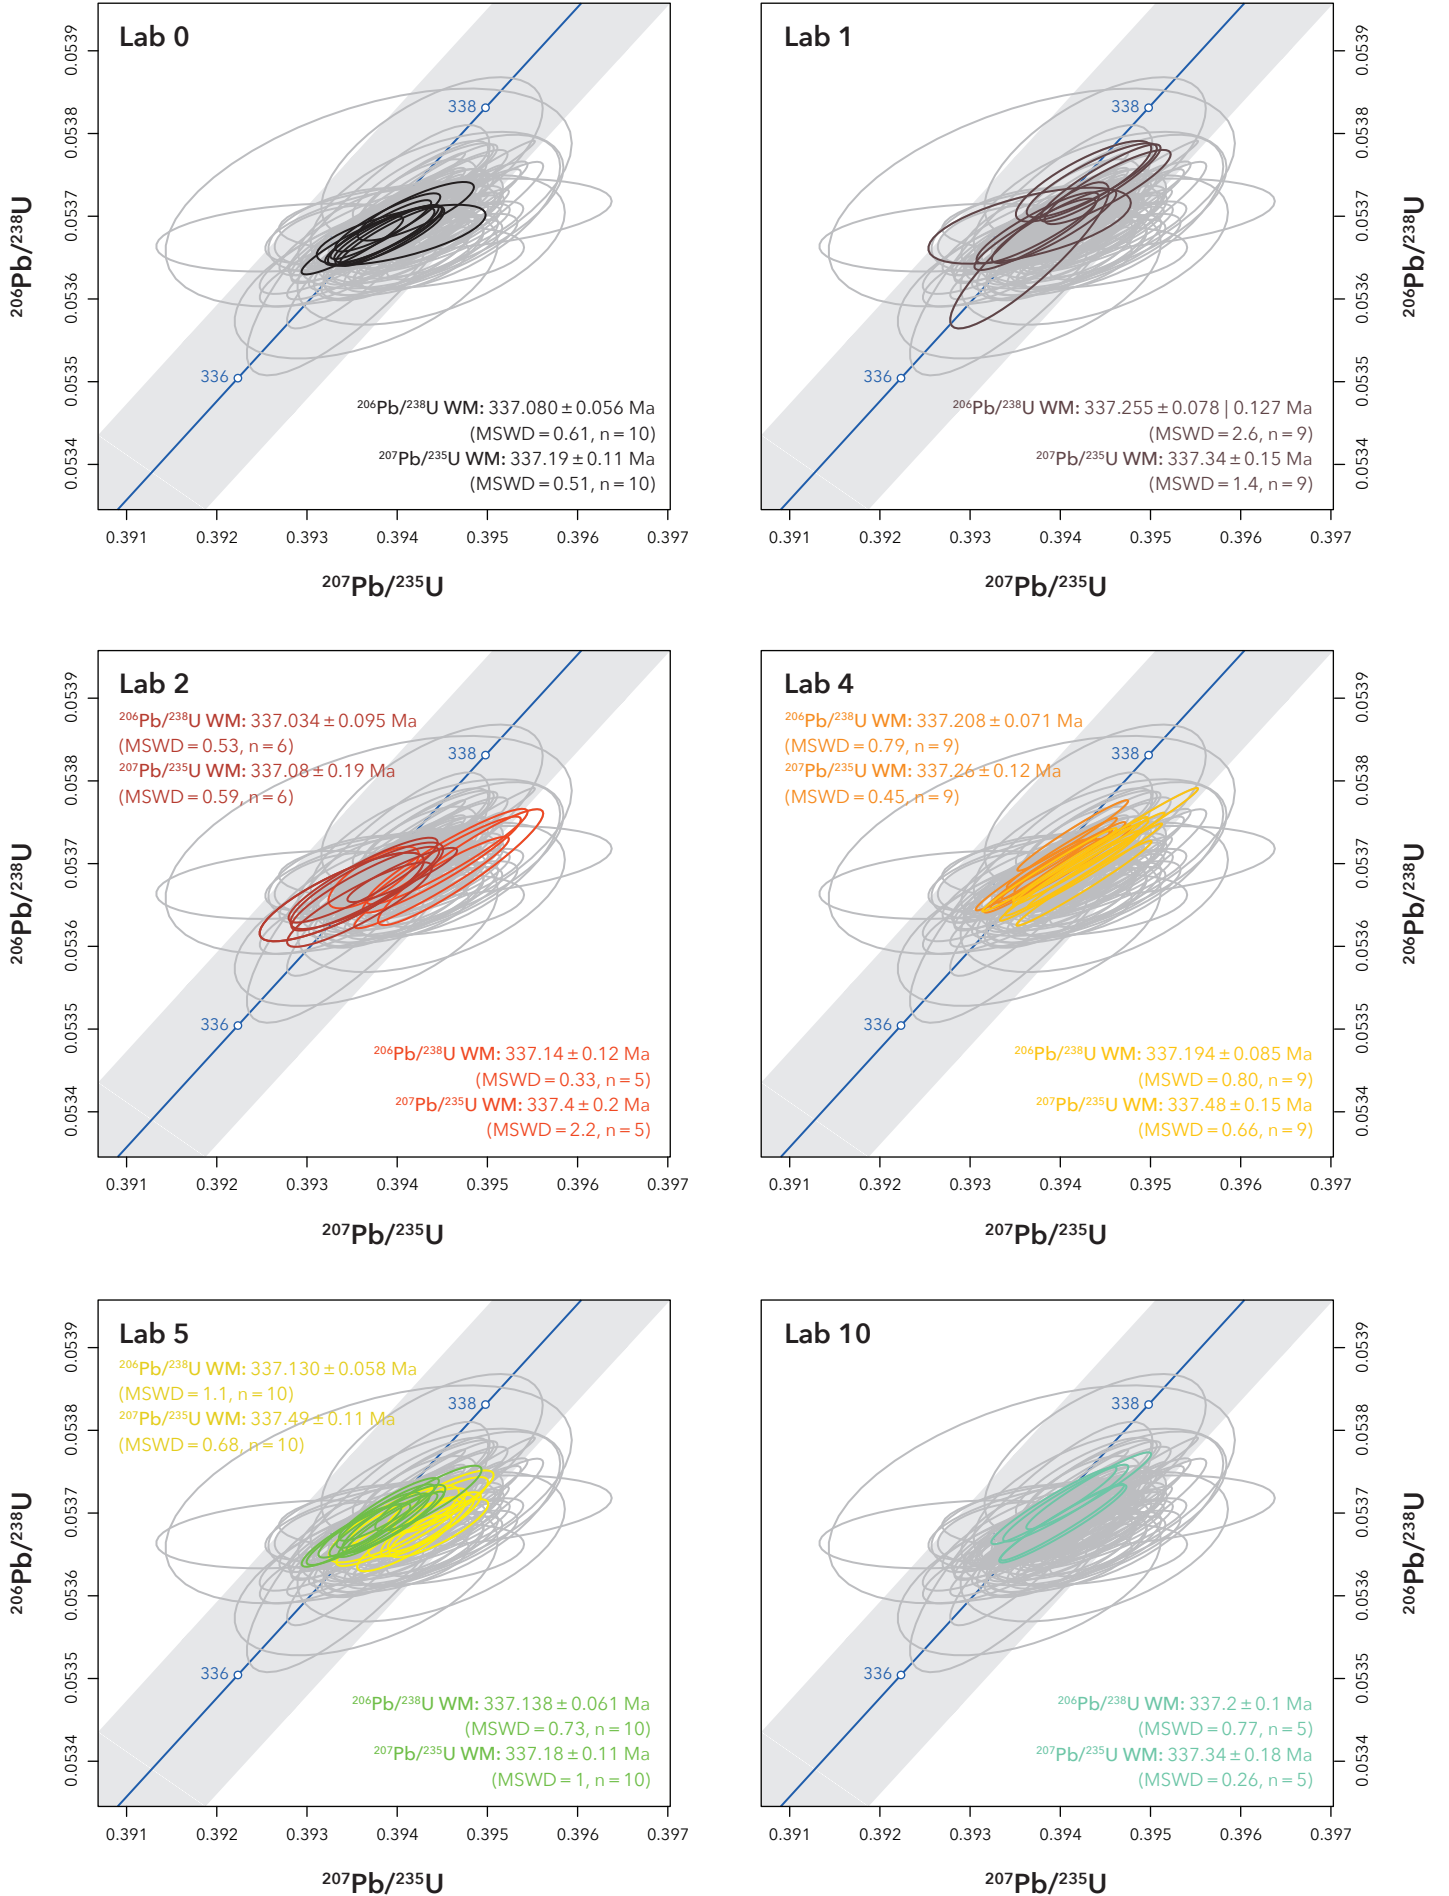

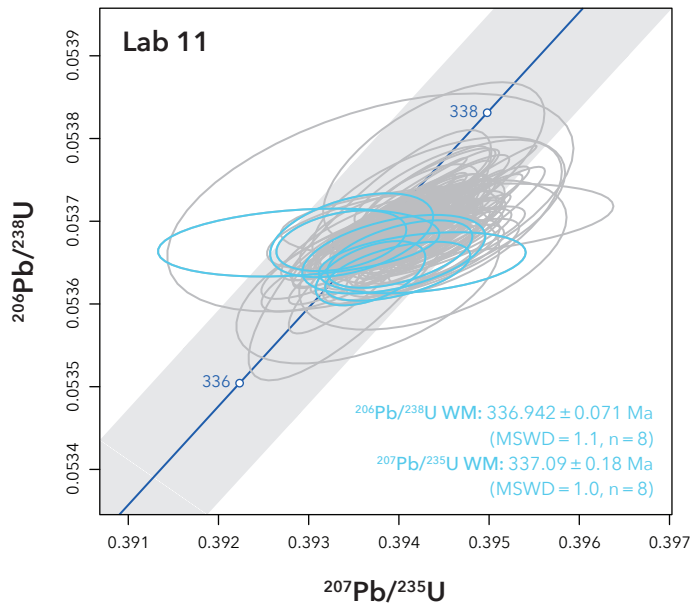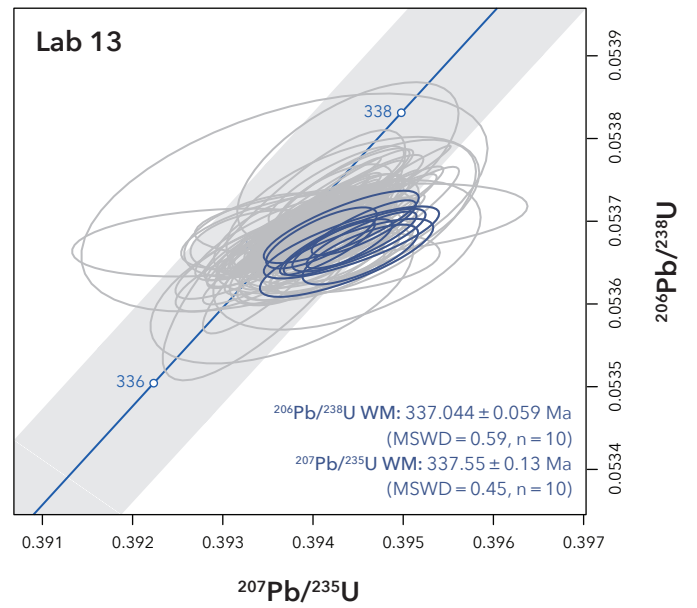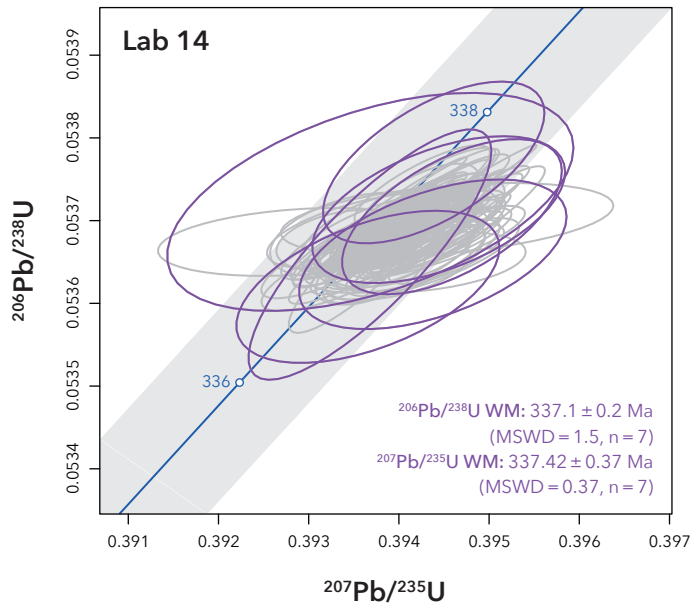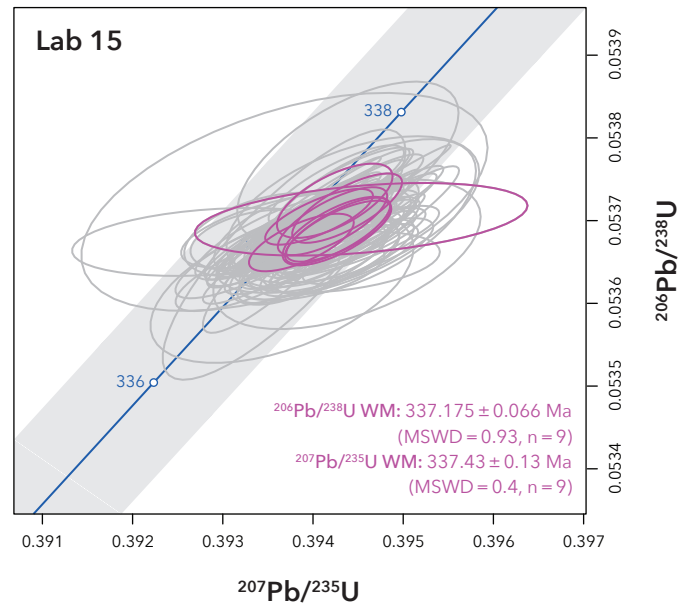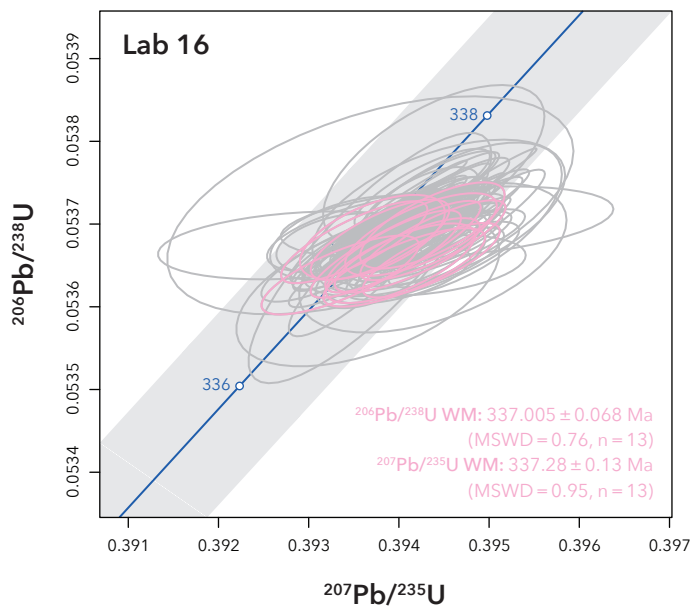

Supplement: Supplementary file 2 [file gchron-7-409-2025-supplement.zip]
